# Supplementary material
Source: publisher figshare collection journal article supplement (https://tandf.figshare.com/ndownloader/files/12931208)
Supplement: Supplementary file 1 [file 12931208]

**Supplemental Fig.1. Chemotactic and cytotoxic activity of Tag7-Mts1 complex depends on Hsp70**. Migration of cells (solid line) was tested with help of Transwell system, as described in Materials and Method section. In upper chambers was applied PBMC. Tag7-Mts1 complex (5х10-8М, Mts1/Tag7=2) was applied in lower chamber. The complex was preincubated for 1 hour with Hsp70 in various concentrations. Following one hour the number of migrated cells in lower chamber was calculated using the MTT test. 100% was the number of cells applied in the upper chamber. Cytotoxity (dashed line) was measured on L929 cells. The same Tag7-Mts1 complex was preincubated with Hsp70 in various concentrations, then protein mixture was applied to L929 cells in 96-well plates (3  104 cells/well) and after 24h of incubation at 37°C the number of dead cells was calculated using the MTT test. Cytotoxity was calculated as where *St* –number of life cells, *Sp* – number of spontaneous dead cells ; *T –* total number of cells.

**Supplemental Fig.2. Tag7-Mts1 complex specifically bound with anti-Tag7 Sepharose.**

Tag7 and Mts1 (1mkg each) were applied on anti-Tag7 Sepharose, extensively washed and developed via Western blot with corresponding antibody.
